# Supplementary material
Source: publisher site journal article supplement (https://www.dovepress.com/get_supplementary_file.php?f=401544.docx)
Supplement: Supplementary file 1 [file get_supplementary_file.php]

**Table 1 Clinicopathological characteristics of non-smoking females with LUAD**

| **Patient id** | **Gender** | **Age(year)** | **Smoking** | **Pathology** | **T** | **N** | **M** | **Stage** |
| --- | --- | --- | --- | --- | --- | --- | --- | --- |
| 1T | female | 55 | Never | ADC | 2a | 0 | 0 | IB |
| 3T | female | 49 | Never | ADC | 1c | 0 | 0 | IA3 |
| 4T | female | 64 | Never | ADC | 2a | 0 | 0 | IB |
| 6T | female | 58 | Never | ADC | 1c | 0 | 0 | IA3 |
| 1N | female | 55 | Never | ADC | 2a | 0 | 0 | IB |
| 3N | female | 49 | Never | ADC | 1c | 0 | 0 | IA3 |
| 4N | female | 64 | Never | ADC | 2a | 0 | 0 | IB |
| 6N | female | 58 | Never | ADC | 1c | 0 | 0 | IA3 |

**Notes:** The lung cancer stage is based on The 8th Edition of the TNM Classification for Lung Cancer.

**Abbreviations:** T, tumor; N, corresponding normal tissues; ADC, Adenocarcinoma; LUAD, Lung Adenocarcinoma.
